# Supplementary material
Source: Preprints.org preprint supplement (doi:10.20944/preprints201910.0058.v1)
Supplement: Supplementary file 3 [file supplementary]

**Supplementary Table 1** List of clinics that contributed to this study.

|  | | **Miyaura Clinic** | **Yokota Clinic** | **Hotta Clinic** | **Terada-Manjyu Clinic** | | **Kondo Clinic** | **Yasui Cｌinic** | | **Ajino-moto Clinic** | **ToyamaRed Cross Hospital** | **Osaka Gyomei-kan Hospital** | **Asahi　Osaka Clinic** | **Total** |
| --- | --- | --- | --- | --- | --- | --- | --- | --- | --- | --- | --- | --- | --- | --- |
| Remarkably effective | | 1 | 1 | 8 | 5 | | 13 | 5 | | 9 | 0 | 2 | 0 | **44** |
| Effective | | 3 | 6 | 17 | 6 | | 13 | 8 | | 5 | 0 | 8 | 6 | **72** |
| Partially effective | | 0 | 0 | 2 | 3 | | 3 | 1 | | 1 | 0 | 2 | 1 | **13** |
| Not effective | | 0 | 3 | 0 | 0 | | 5 | 1 | | 2 | 4 | 3 | 1 | **19** |
| **Total** | | **4** | **10** | **27** | **14** | | **34** | **15** | | **17** | **4** | **15** | **8** | **148** |
| **Duration of evaluation** | | **1978 May** | **1978 May- June** | **1978 Jan.- June** | **1978 June** | | **1978 Jan.- Mar.** | **1978 Apr.- June** | | **1978 May- June** | **1978 May** | **1978 Jan.- Mar.** | **1978 May- July** |  |
| **Clinical Dr.s** | Dr. Toshiro Miyaura | | Dr. Chikara Yokota | Dr. Yoshihiro Hotta  ,Dr. Tetsuji Suyama | Dr.s Nariaki Hashihira, Katsumi Morita, Tatsu Suematsu | Dr. Hirofumi Suzuki | | Dr. Takeyoshi Yasui | Dr. Masamichi Narita | | Dr. Takakazu Tsuneta | Dr. Takeyoshi Yasui, Dr. Iwao Yamaguchi | Dr. Michio Okimura, Dr. Kishio Ito |  |

Numbers indicate the number of patients categorized into four groups after the final evaluation.
